# Supplementary material
Source: MDPI journal article supplement (https://www.mdpi.com/2079-6412/12/12/1965)
Supplement: s1 [file s1]

# Supplementary Material: The Immobilization of Laccase on Mixed Polymeric Microspheres for Methyl Red Decomposition

Ludmila Aricov <sup>1</sup>, Adina Raducan <sup>2</sup>, Ioana Catalina Gifu <sup>3</sup>, Elvira Alexandrescu <sup>3</sup>, Aurica Precupas <sup>1</sup>, Alexandru Vincentiu Florian Neculae <sup>1</sup>, Raluca Marieta Visan <sup>1</sup>, Alina Morosan <sup>4</sup> and Anca Ruxandra Leonties <sup>1,\*</sup>

<sup>1</sup> “Ilie Murgulescu” Institute of Physical Chemistry, Romanian Academy, 060021 Bucharest, Romania; l-aricov@icf.ro (L.A.); aprecupas@icf.ro (A.P.); aneculae@icf.ro (A.V.F.N.); rvisan@icf.ro (R.M.V.)

<sup>2</sup> Department of Physical Chemistry, Faculty of Chemistry, University of Bucharest, 030018, Bucharest, Romania; adina.raducan@g.unibuc.ro

<sup>3</sup> National Institute for Research and Development in Chemistry and Petrochemistry—ICECHIM, 060021 Bucharest, Romania; catalina.gifu@icechim-pd.ro (I.C.G.); elvira.alexandrescu@icechim-pd.ro (E.A.)

<sup>4</sup> Department of Organic Chemistry “Costin Nenitescu”, Faculty of Applied Chemistry and Materials Science, University Politehnica of Bucharest, 011061 Bucharest, Romania; alina.morosan@upb.ro

\* Correspondence: aleonties@icf.ro

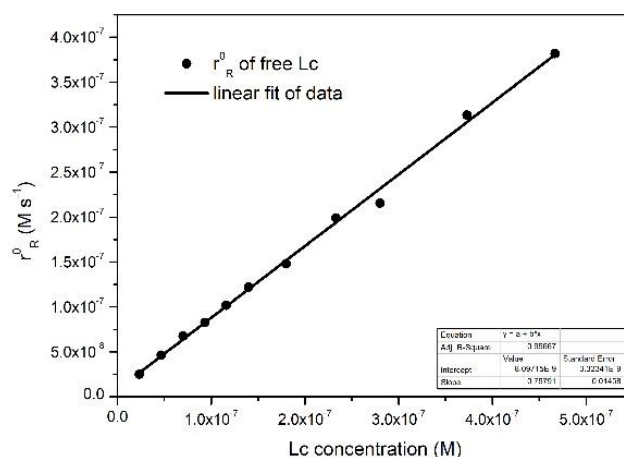

**Figure S1.** The calibration curve of free laccase in presence of ABTS substrate. The straight line represented the best linear fit of the data.

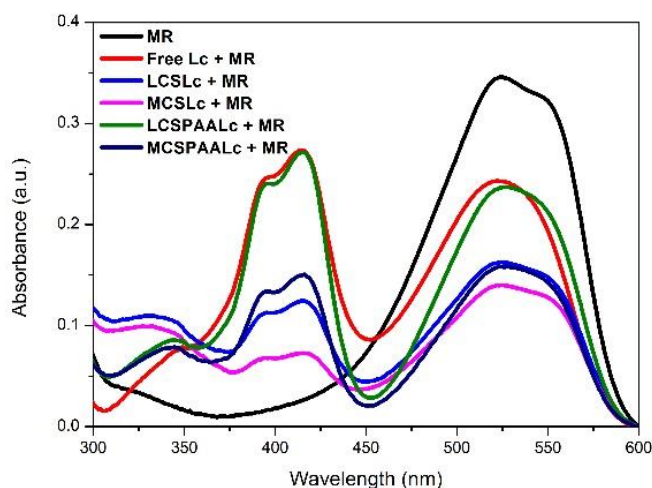

**Figure S2.** The UV-Vis spectra of MR in presence of ABTS and free and immobilized Lc after 20 minutes.

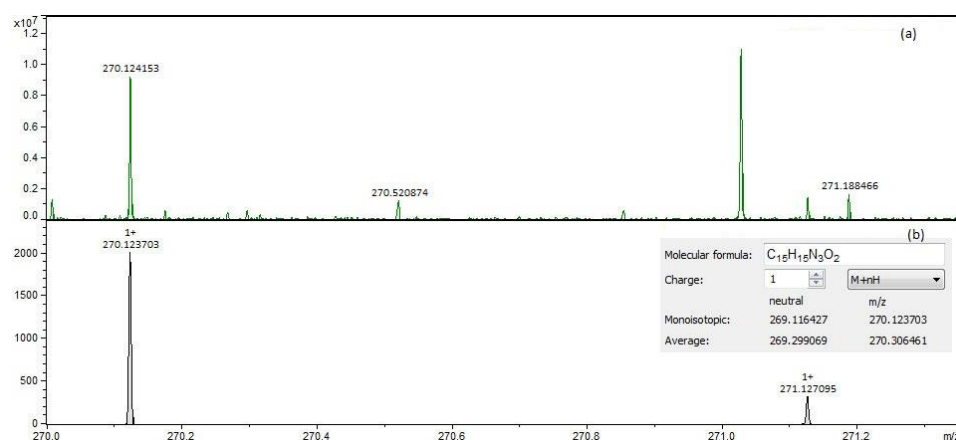

**Figure S3.** The FT-ICR-MS spectra of MR (a. MR and b. Simulated spectra of MR).

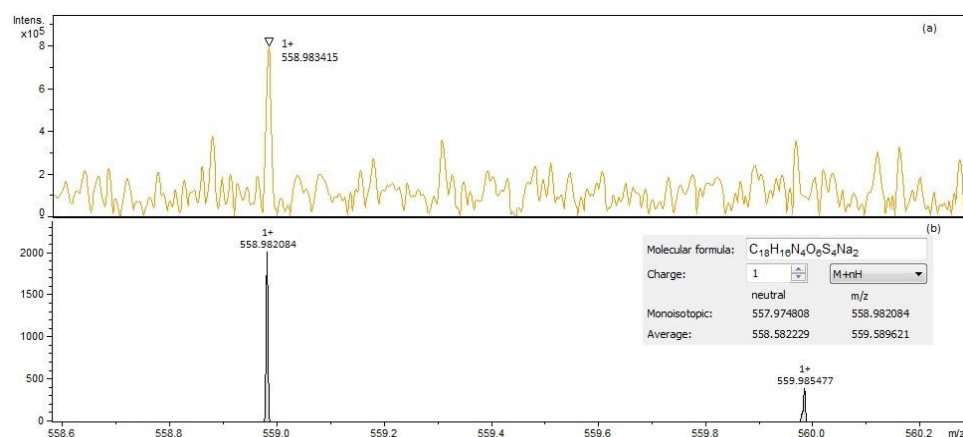

**Figure S4.** The FT-ICR-MS spectra of ABTS (a. ABTS adduct with sodium ions and b. Simulated spectra of ABTS).

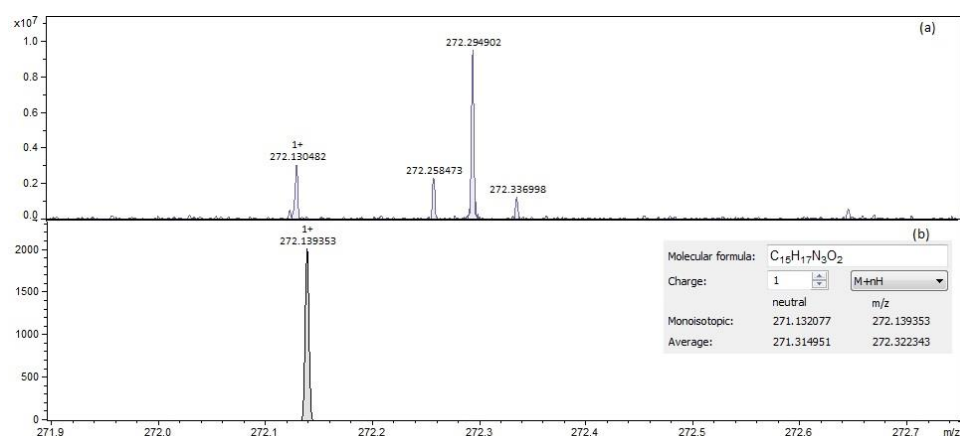

**Figure S5.** The FT-ICR-MS spectra of partially reduced MR (a. Partially reduced MR and b. Simulated spectra of partially reduced MR).

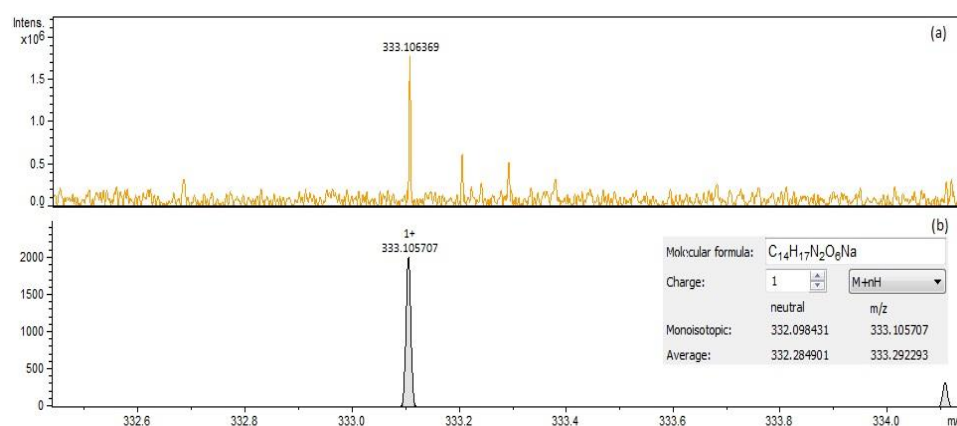

**Figure S6.** The FT-ICR-MS spectra of the N,N-Dimethyl-p-phenylenediamine (a. N,N-Dimethyl-p-phenylenediamine with citric acid and b. Simulated spectra of N,N-Dimethyl-p-phenylenediamine with citric acid).
